# Supplementary material for: Mutations at hypothetical binding site 2 in insulin and insulin-like growth factors 1 and 2 result in receptor- and hormone-specific responses
Source: PubMed Central journal article supplement (PMC6873181; doi:10.1074/jbc.ra119.010072), 2019-09-26
Supplement: supp_RA119.010072_154125_2_supp_399468_py4bwg.pdf [file supp_RA119.010072_154125_2_supp_399468_py4bwg.pdf]

## SUPPORTING INFORMATION

### Mutations at hypothetical binding Site 2 in insulin and insulin-like growth factors 1 and 2 elicit receptor- and hormone-specific responses

Macháčková *et al.*

#### Table of contents

|           |                                                                                                                                              |
|-----------|----------------------------------------------------------------------------------------------------------------------------------------------|
| Table S1  | Binding affinities and receptor activation abilities of analogs for IR-A.                                                                    |
| Table S2  | Binding affinities and receptor activation abilities of analogs for IR-B.                                                                    |
| Table S3  | Binding affinities and receptor activation abilities of analogs for IGF-1R.                                                                  |
| Figure S1 | Representative binding curves of analogs for IR-A                                                                                            |
| Figure S2 | Representative binding curves of analogs for IR-B                                                                                            |
| Figure S3 | Representative binding curves of analogs for IGF-1R                                                                                          |
| Figure S4 | Representative Western blots for relative abilities of IGF-1 analogs to activate receptors'                                                  |
| Figure S5 | Representative Western blots for relative abilities of IGF-2 analogs to activate receptors'                                                  |
| Figure S6 | Representative Western blots for relative abilities of insulin analogs to activate receptors'                                                |
| Table S4  | Summary of available literature data on insulin/IGF-1/IGF-2 analogs modified at A10/51/50, A12/53/52, A13/54/53 and A17/58/57 positions.     |
| Table S5  | Chemical shifts of amino acid residues in Asp58-IGF-1 and native IGF-1.                                                                      |
| Table S6  | Chemical shift differences between Asp51-IGF-1 and native IGF-1.                                                                             |
| Table S7  | NOEs statistics.                                                                                                                             |
| Figure S7 | Differential contact maps calculated from metadynamics of the B-chain C-terminus opening for insulin analogs HisA10, ThrA12, HisA13, HisA17. |
| Figure S8 | Structural characterization of the metadynamics ensembles – hydrophobic collapse and hydrogen bond analysis.                                 |

Supplementary references

**Table S1.** Receptor-binding affinities of human insulin, IGF-1, IGF-2 and analogs for human IR-A in membranes of IM-9 lymphocytes and relative abilities of the hormones/analogues to stimulate phosphorylation of human IR-A in membranes of transfected mouse fibroblasts (details are provided in Methods). The  $K_d$  values or relative stimulations were obtained from at least three measurements. (n) is number of replicates. Asterisks indicate that binding of the ligand to the receptor or activation of the receptor by the ligand differs significantly from that of the native hormone (\* $p$ <0.05; \*\* $p$ <0.01; \*\*\* $p$ < 0.001).

| Native hormone or analog | $K_d \pm$ S.D. for human IR-A [nM] (n) | Relative binding affinity <sup>a</sup> for human IR-A [%] |                       | Relative stimulation of human IR-A [%] |                       |
|--------------------------|----------------------------------------|-----------------------------------------------------------|-----------------------|----------------------------------------|-----------------------|
| Insulin                  | 0.12 ± 0.04 (3)¶                       | 100 ± 33 <sup>b</sup>                                     |                       | 100 ± 8                                |                       |
|                          | 0.32 ± 0.10 (4)"                       | 100 ± 31                                                  |                       |                                        |                       |
|                          | 0.30 ± 0.13 (5)€                       | 100 ± 43                                                  |                       |                                        |                       |
|                          | 0.27 ± 0.01 (5)#                       | 100 ± 4                                                   |                       |                                        |                       |
|                          | 0.18 ± 0.01 (4)\$                      | 100 ± 6                                                   |                       |                                        |                       |
| IGF-1                    | 0.25 ± 0.05 (5)^                       | 100 ± 20                                                  |                       |                                        |                       |
|                          | 24.0 ± 11.5 (3)^                       | 1.0 ± 0.5 <sup>c</sup>                                    | 100 ± 48 <sup>d</sup> | 27 ± 10                                | 100 ± 37 <sup>d</sup> |
| IGF-2                    | 2.9 ± 0.2 (3)^                         | 8.6 ± 1.8                                                 | 100 ± 7               | 63 ± 15                                | 100 ± 24              |
| ValA10-insulin           | 0.44 ± 0.06 (3)"                       | 73 ± 25                                                   |                       | 74 ± 9*                                |                       |
| HisA10-insulin           | 0.74 ± 0.24 (4)¶                       | 16 ± 7.5 **                                               |                       | 41 ± 11***                             |                       |
| Thr51-IGF-1              | 8.1 ± 4.8 (4)\$                        | 2.2 ± 1.3                                                 | 220 ± 170             | 33 ± 10                                | 122 ± 58              |
| His51-IGF-1              | 38.7 ± 2.75 (3)#                       | 0.7 ± 0.06                                                | 70 ± 35               | 36 ± 12                                | 133 ± 66              |
| Thr50-IGF-2              | 2.7 ± 0.2 (3)\$                        | 6.7 ± 0.6                                                 | 78 ± 18               | 68 ± 19                                | 108 ± 40              |
| His50-IGF-2              | 2.1 ± 0.2 (3)\$                        | 8.6 ± 0.9                                                 | 100 ± 23              | 70 ± 17                                | 111 ± 38              |
| ThrA12-insulin           | 0.28 ± 0.11 (3)€                       | 107 ± 62                                                  |                       | 93 ± 17                                |                       |
| ValA13-insulin           | 0.35 ± 0.07 (4)"                       | 91 ± 34                                                   |                       | 71 ± 7*                                |                       |
| HisA13-insulin           | 2.0 ± 1.0 (3)€                         | 15 ± 9**                                                  |                       | 33 ± 9***                              |                       |
| Val54-IGF-1              | 11.2 ± 5.4 (3)\$                       | 1.6 ± 0.8                                                 | 160 ± 113             | 27 ± 11                                | 100 ± 55              |
| His54-IGF-1              | 12.2 ± 1.5 (3)\$                       | 1.5 ± 0.2                                                 | 150 ± 78              | 19 ± 4                                 | 70 ± 30               |
| Val53-IGF-2              | 2.9 ± 0.2 (3)\$                        | 6.2 ± 0.5                                                 | 72 ± 16               | 40 ± 16                                | 63 ± 29*              |
| His53-IGF-2              | 4.1 ± 1.5 (3)\$                        | 4.4 ± 1.6                                                 | 51 ± 21*              | 33 ± 11                                | 52 ± 21**             |
| HisA17-insulin           | 3.8 ± 0.3 (3)#                         | 7.1±0.6***                                                |                       | 0.2 ± 0.2***                           |                       |
| Asp58-IGF-1              | 24.1 ± 2.8 (3)\$                       | 0.75 ± 0.1                                                | 75 ± 39               | 30 ± 16                                | 111 ± 72              |
| His58-IGF-1              | 91 ± 40 (3)\$                          | 0.2 ± 0.09                                                | 20 ± 13**             | 4.8 ± 2.3                              | 18±11***              |
| Asp57-IGF-2              | 2.96 ± 0.28 (3)#                       | 9.1 ± 0.9                                                 | 106 ± 24              | 72 ± 17                                | 115 ± 39              |

<sup>a</sup> Relative binding affinity is defined as ( $K_d$  of the native hormone /  $K_d$  of analog) x 100 (%).

<sup>b</sup> The  $K_d$  of human insulin for IR-A was determined in six independent series of measurements (indexed with ¶, ", €, #, \$ and ^).

<sup>c</sup> The individual  $K_d$  values of ligands in this column are relative to a corresponding native insulin  $K_d$  value (e.g. \$ to \$, etc.)

<sup>d</sup> In these columns for each IGF analogue their values relative to insulin are then expressed relative to native IGF-1 (100%) for IGF-1 analogs or relative to native IGF-2 (100%) for IGF2 analogs.

**Table S2.** Receptor-binding affinities of human insulin, IGF-1, IGF-2 and analogs for human IR-B and relative abilities of the hormones/analogs to stimulate phosphorylation of this receptor in membranes of transfected mouse fibroblasts (details are provided in Methods). The  $K_d$  values or relative stimulations were obtained from at least three measurements. (n) is number of replicates. Asterisks indicate that binding of the ligand to the receptor or activation of the receptor by the ligand differs significantly from that of the native hormone (\* $p$ <0.05; \*\* $p$ <0.01; \*\*\*  $p$ <0.001).

| Native hormone or analog | $K_d \pm$ S.D. for human IR-B [nM] (n)                                                                             | Relative binding affinity <sup>a</sup> for human IR-B [%] |                       | Relative stimulation of human IR-B [%] |                       |
|--------------------------|--------------------------------------------------------------------------------------------------------------------|-----------------------------------------------------------|-----------------------|----------------------------------------|-----------------------|
| Insulin                  | 0.31 ± 0.08 (4)€<br>0.35 ± 0.06 (3)"<br>0.39 ± 0.23 (6)\$<br>0.38 ± 0.10 (4)#<br>0.68 ± 0.28 (5)^<br>224 ± 33 (4)^ | 100 ± 26 <sup>b</sup>                                     |                       | 100 ± 4                                |                       |
| IGF-1                    |                                                                                                                    | 0.3 ± 0.13 <sup>c</sup>                                   | 100 ± 43 <sup>d</sup> | 11 ± 5.2                               | 100 ± 47 <sup>d</sup> |
| IGF-2                    | 35.4 ± 11.2 (4)                                                                                                    | 1.9 ± 1                                                   | 100 ± 52              | 20 ± 7.4                               | 100 ± 37              |
| ValA10-insulin           | 0.66 ± 0.37 (4)"                                                                                                   | 53 ± 31                                                   |                       | 93 ± 15                                |                       |
| HisA10-insulin           | 1.2 ± 0.3 (3)€                                                                                                     | 26 ± 9***                                                 |                       | 46 ± 13***                             |                       |
| Thr51-IGF-1              | 173 ± 18 (3)\$                                                                                                     | 0.2 ± 0.12                                                | 67 ± 49               | nd                                     |                       |
| His51-IGF-1              | 245 ± 130 (3)\$                                                                                                    | 0.16 ± 0.13                                               | 53 ± 49               | 10 ± 6                                 | 91 ± 69               |
| Thr50-IGF-2              | 13.3 ± 4.3 (3)\$                                                                                                   | 2.9 ± 2                                                   | 153 ± 132             | 19 ± 4                                 | 96 ± 49               |
| His50-IGF-2              | 28.9 ± 14.7 (3)\$                                                                                                  | 1.3 ± 1                                                   | 68 ± 63               | 25 ± 5                                 | 123 ± 52              |
| ThrA12-insulin           | 1.22 ± 0.30 (3)#                                                                                                   | 31 ± 11**                                                 |                       | 63 ± 17*                               |                       |
| ValA13-insulin           | 0.94 ± 0.15 (3)#                                                                                                   | 40 ± 12**                                                 |                       | 60 ± 6**                               |                       |
| HisA13-insulin           | 2.64 ± 0.61 (3)#                                                                                                   | 14 ± 4.9***                                               |                       | 29 ± 10***                             |                       |
| Val54-IGF-1              | 78 ± 37 (3)\$                                                                                                      | 0.5 ± 0.38                                                | 167 ± 146             | 13 ± 7                                 | 116 ± 83              |
| His54-IGF-1              | 143 ± 93 (4)\$                                                                                                     | 0.3 ± 0.26                                                | 100 ± 97              | 12 ± 4                                 | 111 ± 64              |
| Val53-IGF-2              | 58 ± 25 (3)\$                                                                                                      | 0.7 ± 0.5                                                 | 37 ± 33*              | 14 ± 2                                 | 69 ± 27               |
| His53-IGF-2              | 24.9 ± 9.9 (3)\$                                                                                                   | 1.6 ± 1.1                                                 | 84 ± 73               | 6.7 ± 1                                | 33 ± 13**             |
| HisA17-insulin           | nd                                                                                                                 |                                                           |                       | nd                                     |                       |
| Asp58-IGF-1              | 250 ± 223 (2)\$                                                                                                    | 0.16 ± 0.17                                               | 53 ± 61               | 8 ± 4                                  | 73 ± 50               |
| His58-IGF-1              | 311 ± 74 (3)\$                                                                                                     | 0.13 ± 0.08                                               | 43 ± 32               | 7.8 ± 2.9                              | 71 ± 43               |
| Asp57-IGF-2              | 9.8 ± 2.8 (6)€                                                                                                     | 3.16 ± 1.2                                                | 166 ± 107*            | 27 ± 11                                | 135 ± 74              |

<sup>a</sup> Relative binding affinity is defined as ( $K_d$  of the native hormone /  $K_d$  of analog) x 100 (%).

<sup>b</sup> The  $K_d$  of human insulin for IR-B was determined in five independent series of measurements (indexed with €, ", \$, # and ^).

<sup>c</sup> The individual  $K_d$  values of ligands in this column are relative to a corresponding native insulin  $K_d$  value (e.g. € to €, etc.).

<sup>d</sup> In these columns for each IGF analogue their values relative to insulin are then expressed relative to native IGF-1 (100%) for IGF-1 analogs or relative to native IGF-2 (100%) for IGF2 analogs.

**Table S3.** Receptor-binding affinities of human insulin, IGF-1, IGF-2 and analogs for human IGF-1R and relative abilities of the hormones/analogs to stimulate phosphorylation of this receptor in membranes of transfected mouse fibroblasts (details are provided in Methods). The  $K_d$  values or relative stimulations were obtained from at least three measurements. (n) is number of replicates. Asterisks indicate that binding of the ligand to the receptor or activation of the receptor by the ligand differs significantly from that of the native hormone (\* $p$ <0.05; \*\* $p$ <0.01; \*\*\*  $p$ <0.001).

| Native hormone or analog | $K_d \pm$ S.D. for human IGF-1R [nM] (n) | Relative binding affinity <sup>a</sup> for human IGF-1R [%] |                       | Relative stimulation of human IGF-1R [%] |                      |
|--------------------------|------------------------------------------|-------------------------------------------------------------|-----------------------|------------------------------------------|----------------------|
| IGF-1                    | 0.11 ± 0.05 (5)#                         | 100 ± 45 <sup>b</sup>                                       |                       | 100 ± 21                                 |                      |
|                          | 0.24 ± 0.11 (5)\$                        | 100 ± 46                                                    |                       |                                          |                      |
|                          | 0.24 ± 0.10 (5)^                         | 100 ± 42                                                    |                       |                                          |                      |
|                          | 0.25 ± 0.09 (4)€                         | 100 ± 36                                                    |                       |                                          |                      |
|                          | 0.19 ± 0.08 (5)"                         | 100 ± 42                                                    |                       |                                          |                      |
| insulin                  | 292 ± 54 (3)^                            | 0.08 ± 0.036 <sup>c</sup>                                   | 100 ± 45 <sup>d</sup> | 2 ± 0.1***                               | 100 ± 5 <sup>d</sup> |
| IGF-2                    | 2.3 ± 1.2 (3)€                           | 11 ± 7                                                      | 100 ± 63              | 61 ± 17**                                | 100 ± 28             |
| ValA10-insulin           | nd                                       |                                                             |                       | 1.6 ± 0.2                                | 80 ± 11              |
| HisA10-insulin           | 451 ± 53 (3)#                            | 0.02 ± 0.009                                                | 25 ± 16*              | 1.0 ± 0.3                                | 50 ± 15              |
| Thr51-IGF-1              | 0.20 ± 0.05 (4)\$                        | 120 ± 63                                                    |                       | 83 ± 15                                  |                      |
| His51-IGF-1              | 0.22 ± 0.01 (4)€                         | 109 ± 50                                                    |                       | 98 ± 30                                  |                      |
| Thr50-IGF-2              | 0.84 ± 0.17 (4)\$                        | 29 ± 14                                                     | 264 ± 210             | 60 ± 17                                  | 98 ± 39              |
| His50-IGF-2              | 1.6 ± 0.8 (4)\$                          | 15 ± 10                                                     | 136 ± 125             | 64 ± 21                                  | 105 ± 45             |
| ThrA12-insulin           | 372 ± 174 (4)"                           | 0.05 ± 0.03                                                 | 63 ± 47               | 1.6 ± 0.4                                | 80 ± 20              |
| ValA13-insulin           | nd                                       |                                                             |                       | 2.0 ± 0.4                                | 100 ± 21             |
| HisA13-insulin           | 167 ± 44 (4)"                            | 0.11 ± 0.05                                                 | 138 ± 88              | 1.4 ± 0.6                                | 70 ± 30              |
| Val54-IGF-1              | 0.23 ± 0.04 (3)\$                        | 104 ± 51                                                    |                       | 66 ± 16*                                 |                      |
| His54-IGF-1              | 0.38 ± 0.08 (3)\$                        | 63 ± 32                                                     |                       | 73 ± 14                                  |                      |
| Val53-IGF-2              | 1.5 ± 0.3 (3)\$                          | 16 ± 8                                                      | 145 ± 117             | 45 ± 15                                  | 74 ± 32              |
| His53-IGF-2              | 1.2 ± 0.4 (4)\$                          | 20 ± 11                                                     | 182 ± 152             | 46 ± 20                                  | 75 ± 39              |
| HisA17-insulin           | nd                                       |                                                             |                       | 0                                        | 0                    |
| Asp58-IGF-1              | 0.80 ± 0.26 (3)€                         | 31.3 ± 15**                                                 |                       | 99 ± 32                                  |                      |
| His58-IGF-1              | 3.3 ± 0.2 (3)\$                          | 7.3 ± 3.4*                                                  |                       | 60 ± 15**                                |                      |
| Asp57-IGF-2              | 0.5 ± 0.2 (4)#                           | 22 ± 13                                                     | 200 ± 173             | 73 ± 23                                  | 120 ± 50             |

<sup>a</sup> Relative binding affinity is defined as ( $K_d$  of the native hormone /  $K_d$  of analog) x 100 (%).

<sup>b</sup> The  $K_d$  of human IGF-1 for IR-IGF-1R was determined in five independent series of measurements (indexed as #, \$, ^, € and ").

<sup>c</sup> The individual  $K_d$  values of ligands in this column are relative to a corresponding native IGF-1  $K_d$  value (e.g. # to #, etc.).

<sup>d</sup> In these columns for each IGF analogue their values relative to insulin are then expressed relative to native IGF-1 (100%) for IGF-1 analogs or relative to native IGF-2 (100%) for IGF2 analogs.

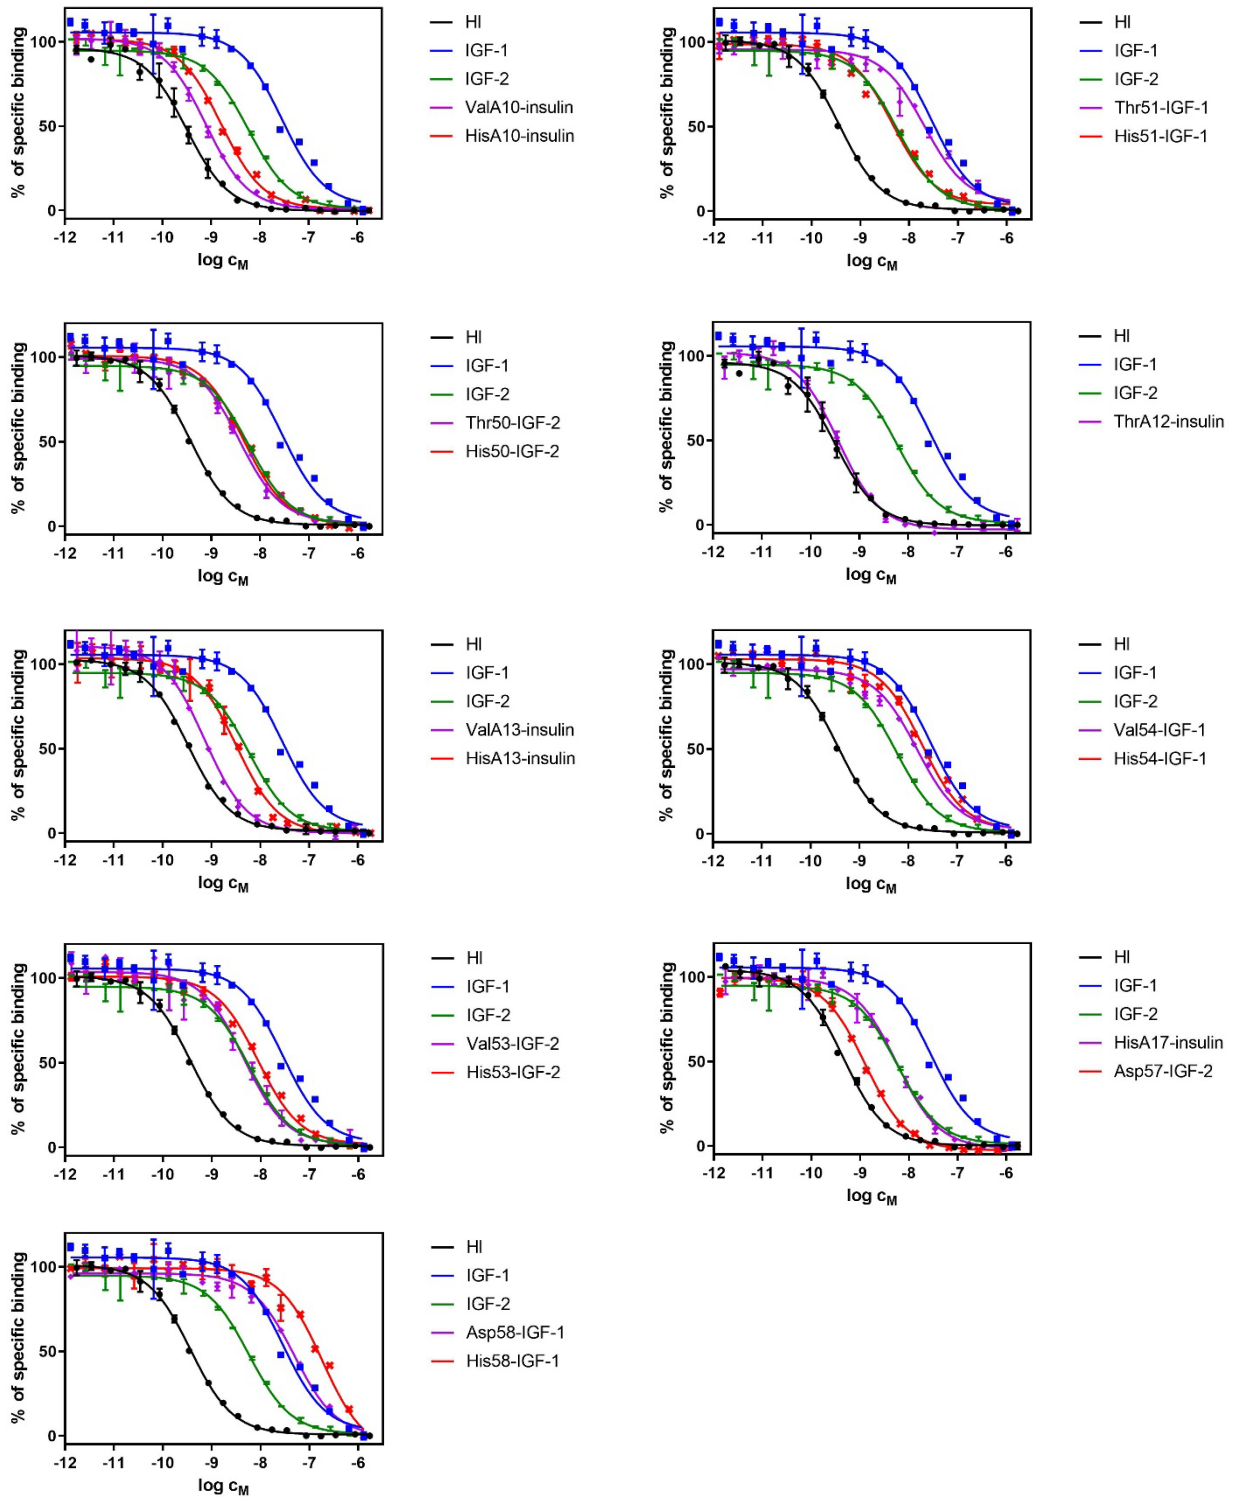

**Figure S1. Binding curves for IR-A.** Inhibition of binding of human [ $^{125}$ I]-monoiodotyrosyl-insulin to IR-A by human insulin (HI), IGF-1, IGF-2 and analogs. Representative binding curve for each hormone or analog is shown.

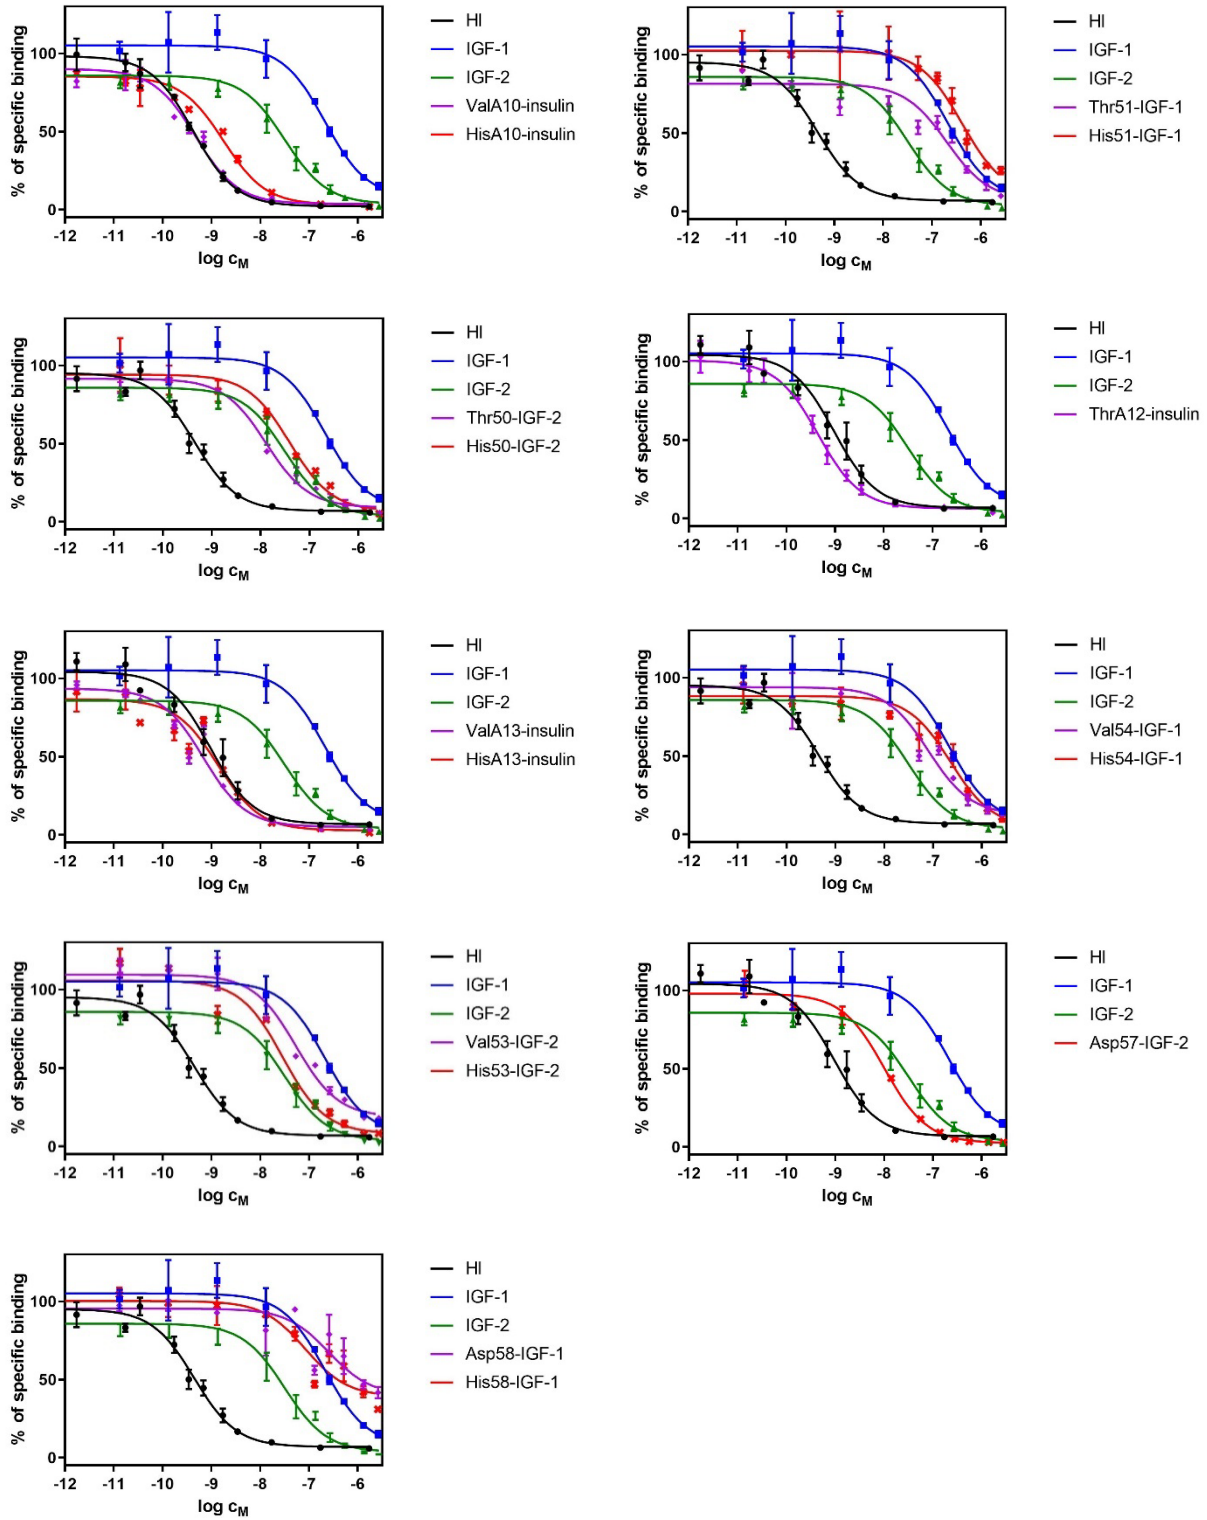

**Figure S2. Binding curves for IR-B.** Inhibition of binding of human  $[^{125}\text{I}]$ -monoiodotyrosyl-insulin to IR-B by human insulin (HI), IGF-1, IGF-2 and analogs. Representative binding curve for each hormone or analog is shown.

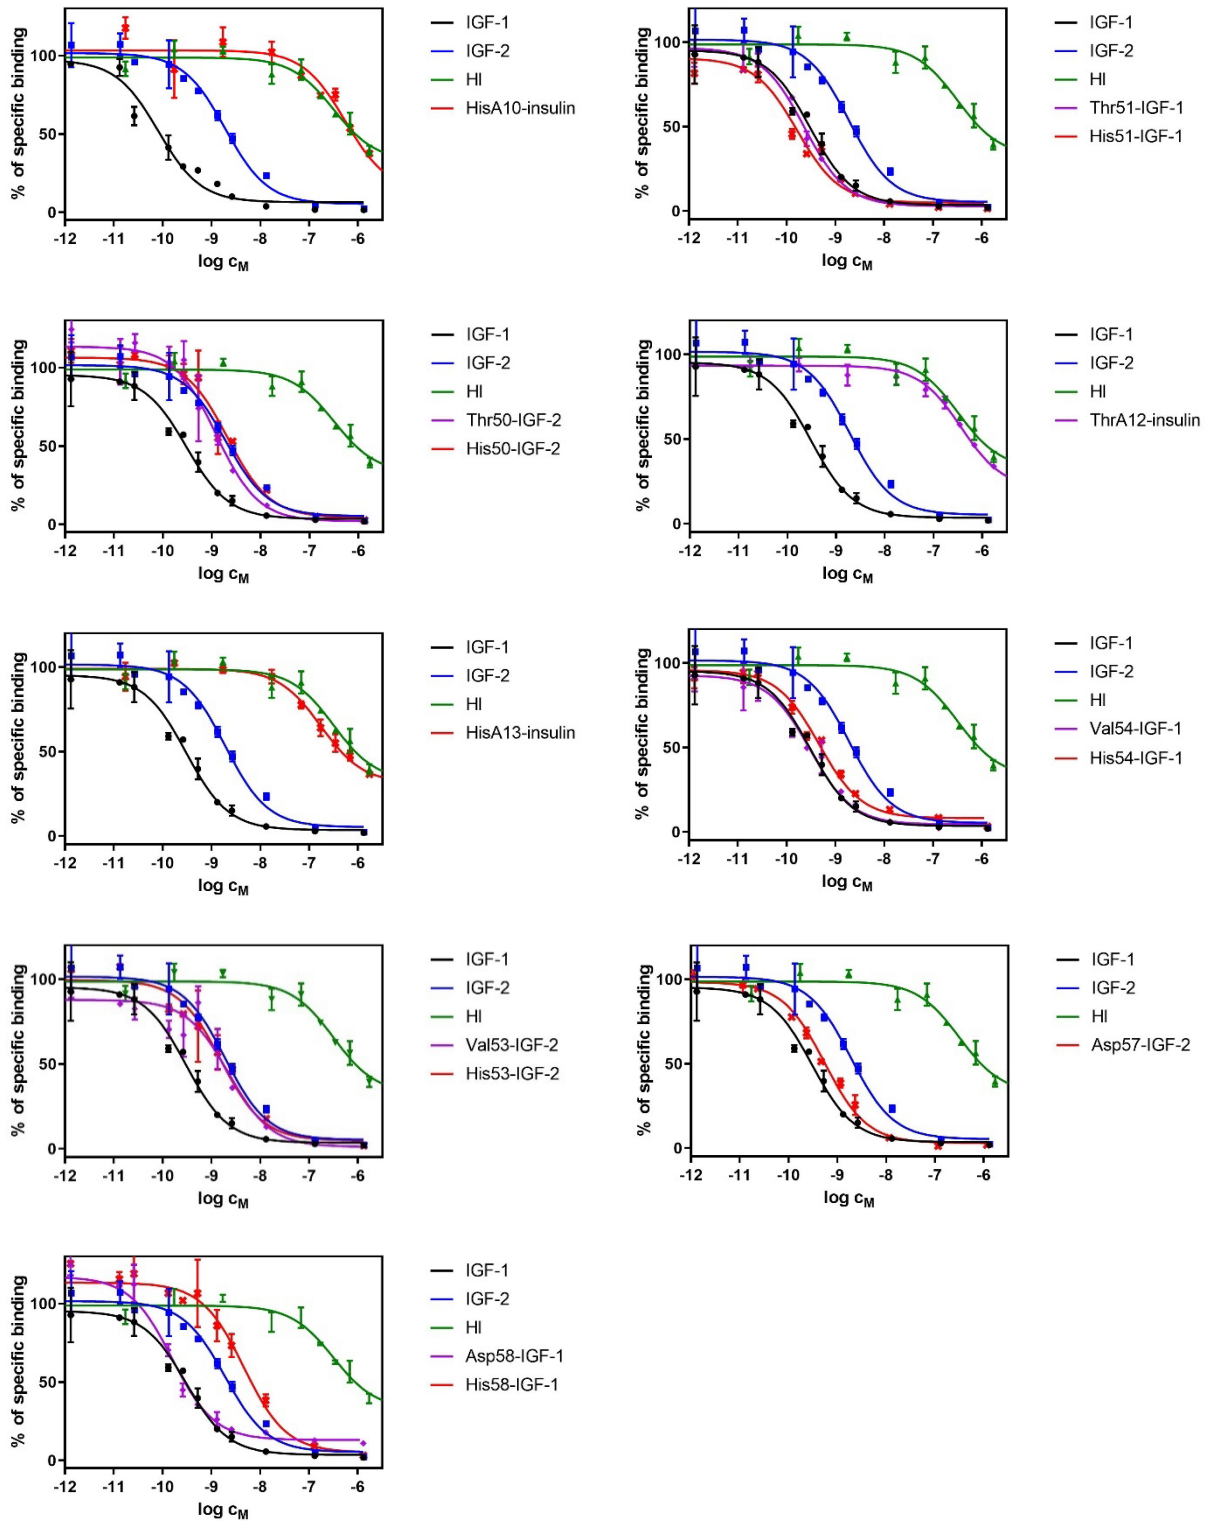

**Figure S3. Binding curves for IGF-1R.** Inhibition of binding of human [<sup>125</sup>I]-iodotyrosyl-IGF-1 to IGF-1R by human insulin (HI), IGF-1, IGF-2 and analogs. Representative binding curve for each hormone or analog is shown.

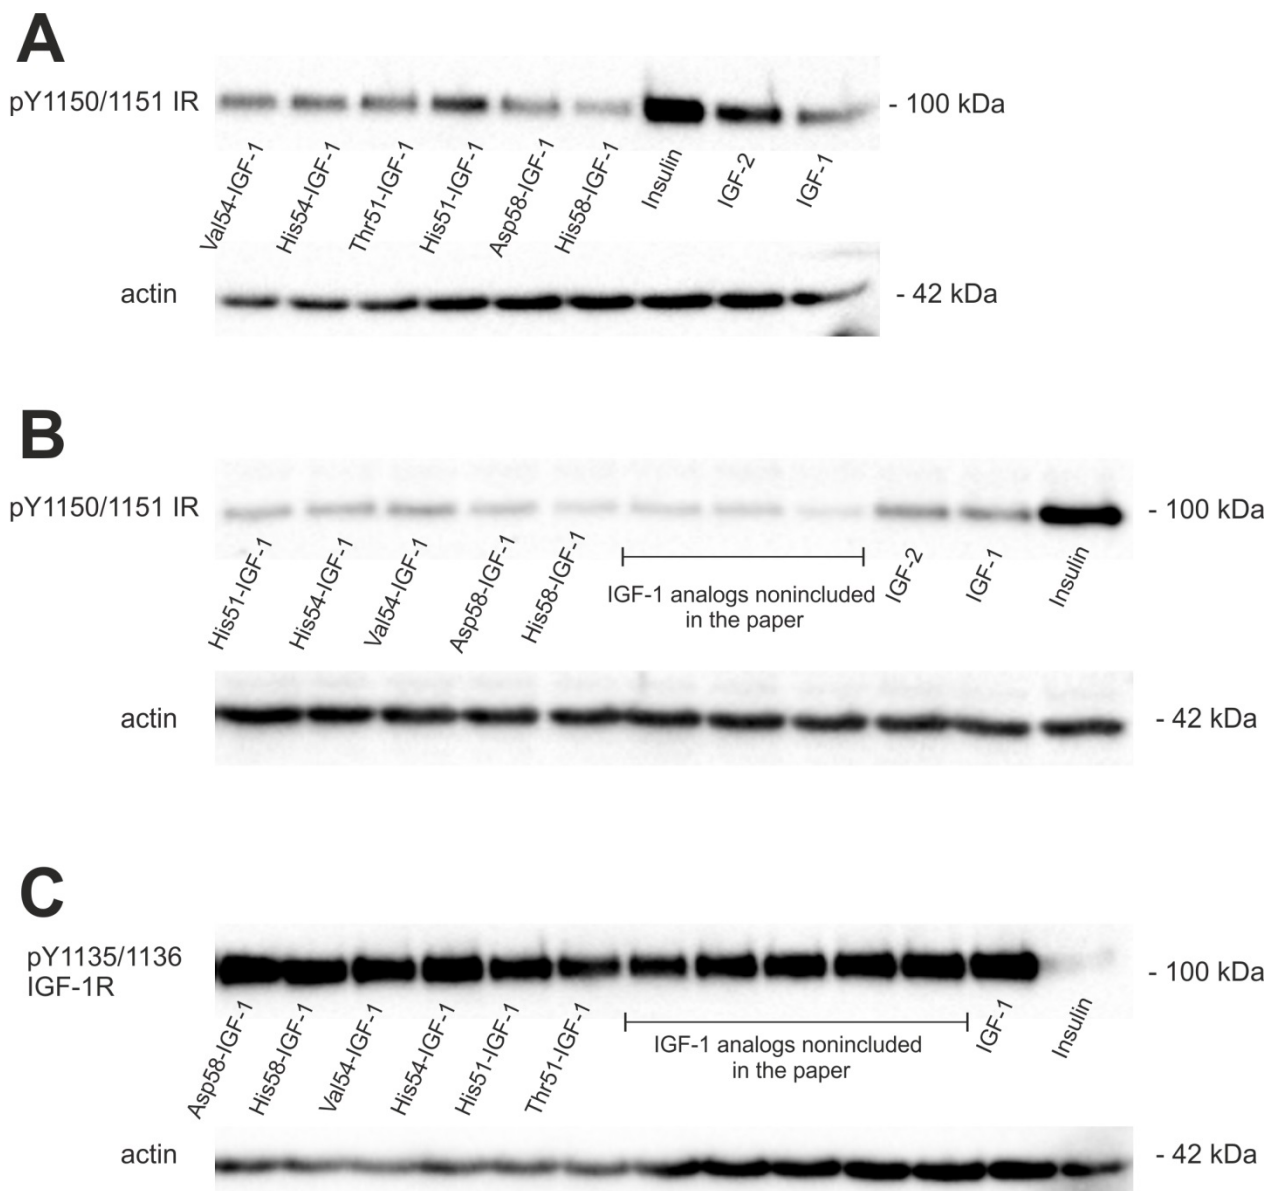

**Figure S4. Representative Western blots for relative abilities of IGF-1 analogs to stimulate receptors' phosphorylation. A.** IR-A transfected fibroblasts. **B.** IR-B transfected fibroblasts. **C.** IGF-1R transfected fibroblasts. Cells were stimulated with 10 nM ligands for 10 min. Membranes were cut at 75 kDa and 50 kDa standards and respective parts were developed with anti-phospho-IGF-1R $\beta$  (Tyr1135/1136)/IR $\beta$  (Tyr1150/1151) antibody (Mr above 75 kDa) and with anti-actin antibody (Mr below 50 kDa). In some cases, cells were also stimulated with analogs that were not discussed in the manuscript.



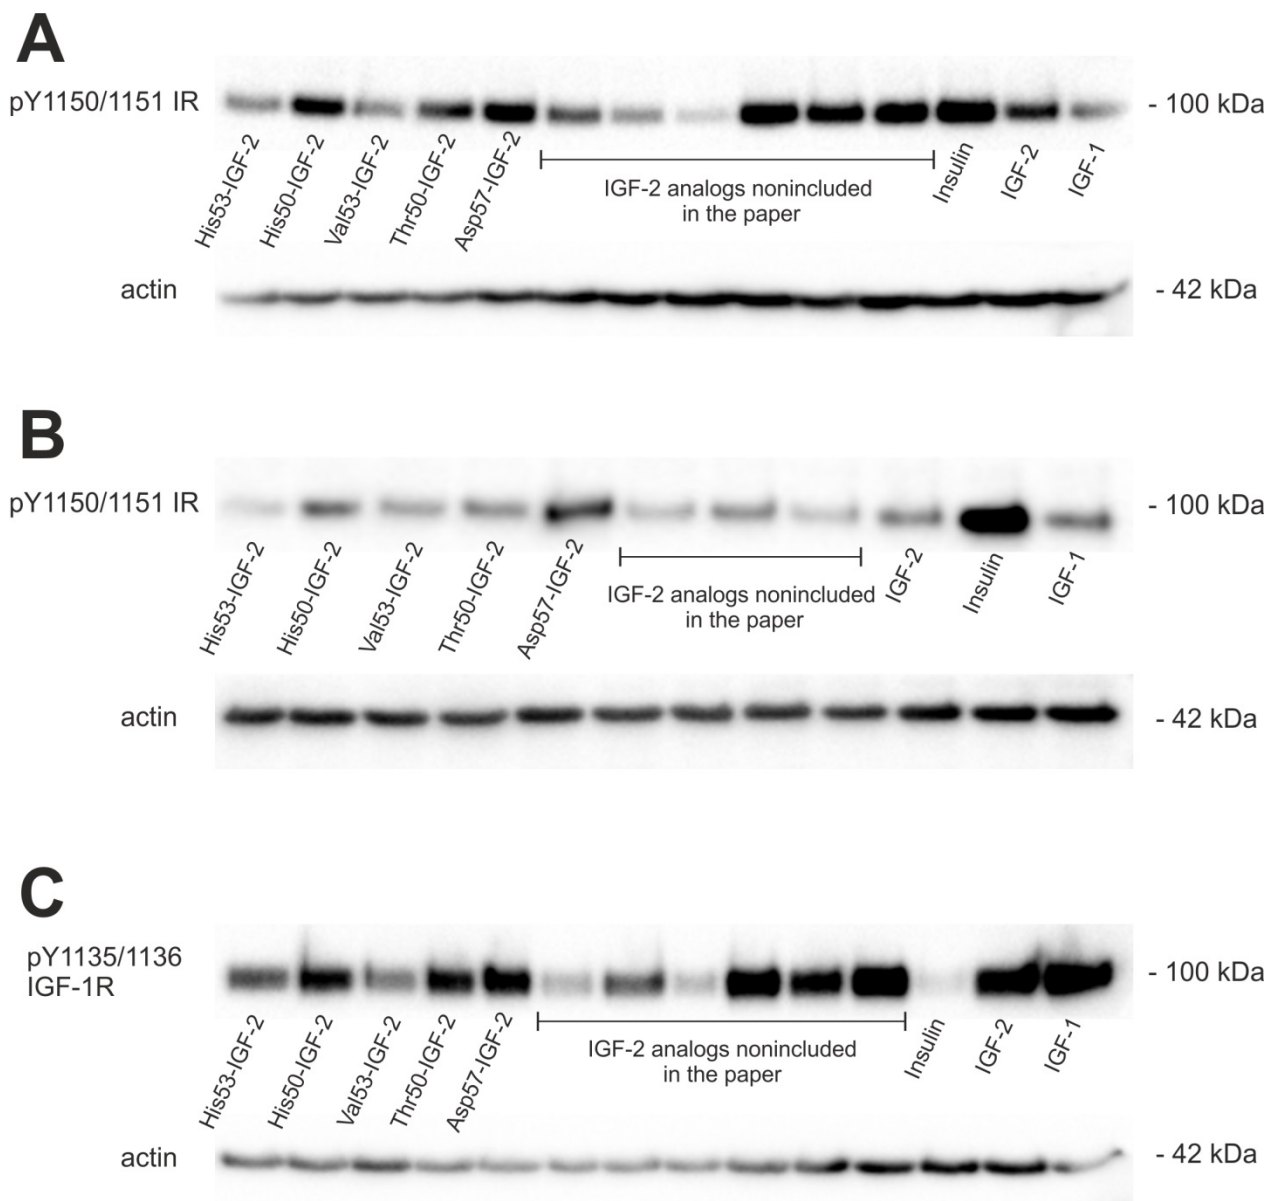

**Figure S5. Representative Western blots for relative abilities of IGF-2 analogs to stimulate receptors' phosphorylation. A.** IR-A transfected fibroblasts. **B.** IR-B transfected fibroblasts. **C.** IGF-1R transfected fibroblasts. Cells were stimulated with 10 nM ligands for 10 min. Membranes were cut at 75 kDa and 50 kDa standards and respective parts were developed with anti-phospho-IGF-1R $\beta$  (Tyr1135/1136)/IR $\beta$  (Tyr1150/1151) antibody (Mr above 75 kDa) and with anti-actin antibody (Mr bellow 50 kDa). In some cases, cells were also stimulated with analogs that were not discussed in the manuscript.

**A**

pY1150/1151 IR

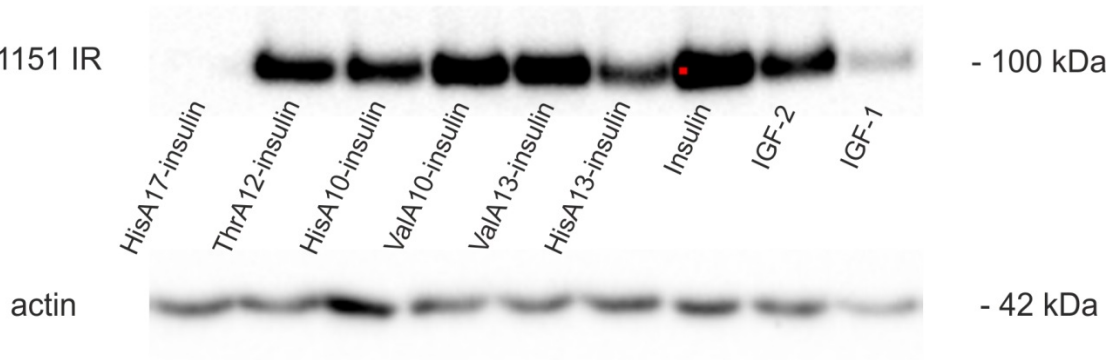**B**

pY1150/1151 IR

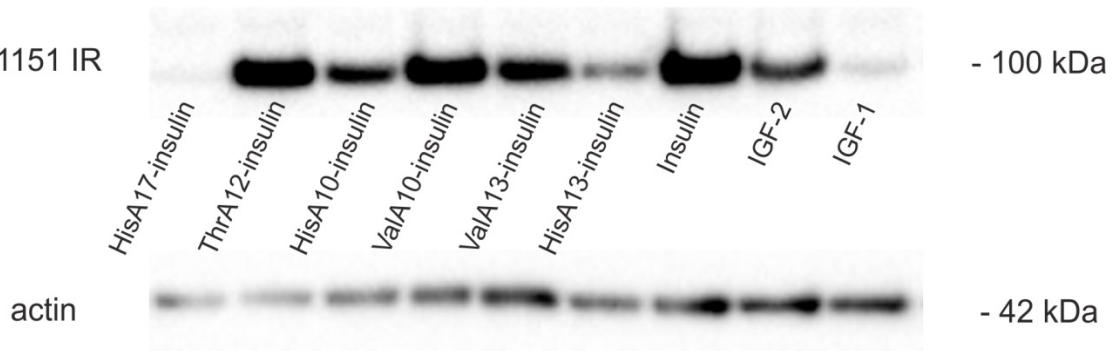**C**pY1135/1136  
IGF-1R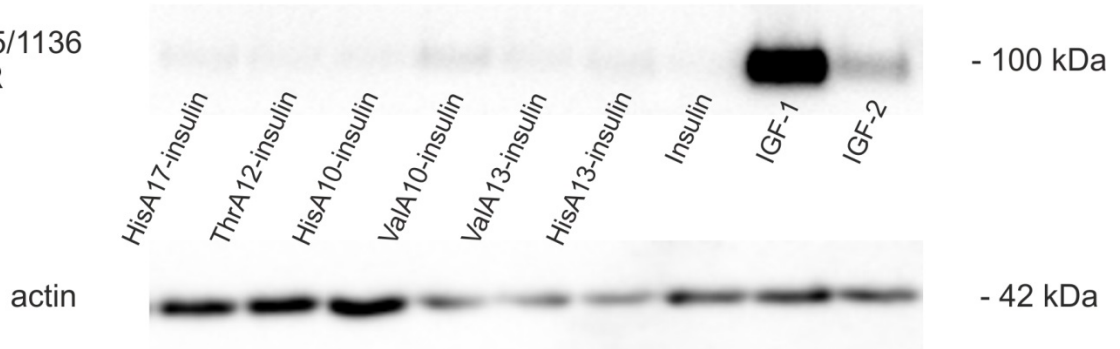

**Figure S6. Representative Western blots for relative abilities of insulin analogs to stimulate receptors' phosphorylation. A.** IR-A transfected fibroblasts. **B.** IR-B transfected fibroblasts. **C.** IGF-1R transfected fibroblasts. Cells were stimulated with 10 nM ligands for 10 min. Membranes were cut at 75 kDa and 50 kDa standards and respective parts were developed with anti-phospho-IGF-1R $\beta$  (Tyr1135/1136)/IR $\beta$  (Tyr1150/1151) antibody (Mr above 75 kDa) and with anti-actin antibody (Mr below 50 kDa).

**Table S4.** Relative binding affinities of insulin analogs mutated at positions A10/A12/A3/A17, IGF-1 analogs mutated at 51/53/54/58 positions and IGF-2 analogs mutated at 52/53/57 sites. We have not found any available data on IGF-2 mutated at the position 50. Relative binding affinity is expressed in % of binding affinity of the native hormone.

| Position in the native hormone | Mutation | Binding affinity (in % of the native hormone) for  |      |        | References                                                 |
|--------------------------------|----------|----------------------------------------------------|------|--------|------------------------------------------------------------|
|                                |          | IR-A                                               | IR-B | IGF-1R |                                                            |
| IleA10-insulin                 | Ser      | 20                                                 |      |        | Ref. (1)                                                   |
| Ser51-IGF-1                    | Ile      | 61                                                 |      |        | Ref. (1)                                                   |
| SerA12-insulin                 | Ala      | 108<br>(soluble receptor)<br>36<br>(cell receptor) |      |        | Ref. (2)<br><br>A.-M. Jensen thesis referenced in Ref. (3) |
| Asp53-IGF-1                    | Ala      |                                                    |      | 66     | Ref. (4)                                                   |
| Asp52-IGF-2                    | Ala      | 133                                                | 134  | 87     | Ref. (5)                                                   |
|                                | Asn      |                                                    |      | 170    | Ref. (6)                                                   |
|                                | Lys      |                                                    |      | 60     | Ref. (6)                                                   |
|                                | Glu      |                                                    |      | 30     | Ref. (6)                                                   |
| LeuA13-insulin                 | Ala      | 30                                                 |      |        | Ref. (2)                                                   |
|                                | Glu      | 20                                                 |      | 163    | Ref. (7)                                                   |
| Leu54-IGF-1                    | Ala      |                                                    |      | 24     | Ref. (4)                                                   |
| Leu53-IGF-2                    | Ala      | 25                                                 | 43   | 40     | Ref. (5)                                                   |
|                                |          |                                                    |      | 50     | Ref. (6)                                                   |
| GluA17-insulin                 | Ala      | 56<br>(soluble receptor)                           |      |        | Ref. (2)                                                   |
|                                |          | 35<br>(cell receptor)                              |      |        | A.-M. Jensen thesis referenced in Ref. (3)                 |
| Glu58-IGF-1                    | Ala      |                                                    |      | 15     | Ref. (4)                                                   |
| Glu57-IGF-2                    | Ala      | 17                                                 | 17   | 34     | Ref. (5)                                                   |

**Table S5.** Chemical shifts of amino acid residues in Asp58-IGF-1 and native IGF-1. (The <sup>15</sup>N signals of prolines were not detected).

| Asp58-IGF-1 |      |                 |            |              |      |                 | native IGF-1 |       |      |                 |            |              |      |                 |            |
|-------------|------|-----------------|------------|--------------|------|-----------------|--------------|-------|------|-----------------|------------|--------------|------|-----------------|------------|
|             | NH   | <sup>15</sup> N | H $\alpha$ |              | NH   | <sup>15</sup> N | H $\alpha$   |       | NH   | <sup>15</sup> N | H $\alpha$ |              | NH   | <sup>15</sup> N | H $\alpha$ |
| Gly1        | 8.42 | 108.82          | 4.17,4.19  | Arg36        | 8.13 | 122.14          | 4.33         | Gly1  | 8.42 | 108.83          | 4.16,4.21  | Arg36        | 8.13 | 122.18          | 4.33       |
| Pro2        | -    | *               | 4.42       | Arg37        | 8.13 | 121.29          | 4.33         | Pro2  | -    | *               | 4.41       | Arg37        | 8.12 | 121.22          | 4.32       |
| Glu3        | 8.57 | 120.09          | 4.47       | Ala38        | 8.13 | 126.00          | 4.57         | Glu3  | 8.57 | 120.08          | 4.48       | Ala38        | 8.11 | 126.00          | 4.57       |
| Thr4        | 8.00 | 114.44          | 4.50       | Pro39        | -    | *               | 4.41         | Thr4  | 8.00 | 114.65          | 4.49       | Pro39        | -    | *               | 4.41       |
| Leu5        | 8.24 | 124.29          | 4.44       | Gln40        | 8.42 | 119.90          | 4.37         | Leu5  | 8.27 | 124.43          | 4.45       | Gln40        | 8.42 | 119.96          | 4.38       |
| Cys6        | 8.18 | 120.48          | 4.68       | Thr41        | 8.03 | 114.07          | 4.34         | Cys6  | 8.24 | 120.28          | 4.69       | Thr41        | 8.03 | 114.12          | 4.36       |
| Gly7        | 8.65 | 110.54          | 3.80,3.93  | Gly42        | 8.45 | 110.83          | 4.08,4.06    | Gly7  | 8.71 | 110.82          | 3.92,3.76  | Gly42        | 8.47 | 110.98          | 4.07,4.13  |
| Ala8        | 8.57 | 126.73          | 4.09       | Ile43        | 7.85 | 120.24          | 4.00         | Ala8  | 8.62 | 127.2           | 4.07       | Ile43        | 7.84 | 120.40          | 3.96       |
| Glu9        | 8.09 | 115.84          | 4.14       | Val44        | 7.89 | 122.07          | 3.73         | Glu9  | 8.05 | 115.7           | 4.12       | Val44        | 7.88 | 122.22          | 3.70       |
| Leu10       | 7.39 | 121.37          | 4.03       | Asp45        | 7.98 | 120.61          | 4.51         | Leu10 | 7.33 | 121.32          | 3.99       | Asp45        | 7.92 | 120.49          | 4.50       |
| Val11       | 7.50 | 117.90          | 3.40       | Glu46        | 7.99 | 118.50          | 4.16         | Val11 | 7.41 | 117.89          | 3.33       | Glu46        | 7.95 | 118.38          | 4.14       |
| Asp12       | 8.09 | 118.14          | 4.41       | Cys47        | 8.22 | 114.34          | 4.81         | Asp12 | 8.07 | 117.93          | 4.39       | Cys47        | 8.23 | 113.87          | 4.86       |
| Ala13       | 7.75 | 122.95          | 4.22       | Cys48        | 7.98 | 116.85          | 4.55         | Ala13 | 7.75 | 123.02          | 4.23       | Cys48        | 7.95 | 116.82          | 4.55       |
| Leu14       | 8.10 | 118.70          | 3.87       | Phe49        | 7.84 | 116.68          | 4.67         | Leu14 | 8.12 | 118.72          | 3.82       | Phe49        | 7.84 | 116.58          | 4.67       |
| Gln15       | 8.13 | 118.45          | 4.12       | Arg50        | 7.78 | 118.58          | 4.44         | Gln15 | 8.13 | 118.58          | 4.12       | Arg50        | 7.74 | 118.57          | 4.46       |
| Phe16       | 7.69 | 118.69          | 4.44       | Ser51        | 7.88 | 112.78          | 4.47         | Phe16 | 7.66 | 118.65          | 4.42       | Ser51        | 7.88 | 112.73          | 4.47       |
| Val17       | 8.29 | 118.22          | 3.74       | Cys52        | 8.83 | 121.20          | 4.83         | Val17 | 8.42 | 118.02          | 3.69       | Cys52        | 8.93 | 121.39          | 4.86       |
| Cys18       | 8.54 | 116.08          | 4.79       | Asp53        | 8.28 | 121.77          | 4.69         | Cys18 | 8.59 | 115.77          | 4.80       | Asp53        | 8.16 | 121.80          | 4.69       |
| Gly19       | 7.81 | 109.31          | 3.95,3.98  | Leu54        | 8.42 | 124.70          | 4.02         | Gly19 | 7.73 | 109.2           | 3.96,3.99  | Leu54        | 8.39 | 123.05          | 3.99       |
| Asp20       | 8.68 | 122.51          | 4.55       | Arg55        | 8.13 | 117.08          | 4.12         | Asp20 | 8.74 | 122.73          | 4.54       | Arg55        | 8.06 | 116.72          | 4.03       |
| Arg21       | 8.07 | 118.63          | 4.19       | Arg56        | 7.81 | 118.05          | 4.34         | Arg21 | 8.05 | 118.5           | 4.17       | Arg56        | 7.82 | 118.63          | 4.20       |
| Gly22       | 7.55 | 104.57          | 3.77,3.98  | Leu57        | 7.80 | 119.18          | 4.20         | Gly22 | 7.46 | 104.24          | 4.01,3.77  | Leu57        | 7.86 | 118.53          | 4.15       |
| Phe23       | 7.58 | 115.20          | 5.01       | <b>Asp58</b> | 8.05 | 115.18          | 4.56         | Phe23 | 7.54 | 114.6           | 5.07       | <b>Gln58</b> | 7.87 | 114.85          | 4.22       |
| Tyr24       | 8.44 | 119.68          | 4.73       | Met59        | 7.67 | 117.74          | 4.24         | Tyr24 | 8.51 | 119.54          | 4.70       | Met59        | 7.57 | 117.18          | 4.21       |
| Phe25       | 8.19 | 118.04          | 4.67       | Tyr60        | 7.93 | 117.65          | 4.56         | Phe25 | 8.17 | 118.03          | 4.69       | Tyr60        | 7.90 | 117.19          | 4.52       |
| Asn26       | 8.12 | 119.61          | 4.73       | Cys61        | 7.46 | 116.20          | 5.02         | Asn26 | 8.12 | 119.5           | 4.77       | Cys61        | 7.41 | 115.92          | 5.04       |
| Lys27       | 8.11 | 122.14          | 4.47       | Ala62        | 8.24 | 126.53          | 4.43         | Lys27 | 8.15 | 122.23          | 4.48       | Ala62        | 8.26 | 126.77          | 4.42       |
| Pro28       | -    | *               | 4.47       | Pro63        | -    | *               | 4.40         | Pro28 | -    | *               | 4.46       | Pro63        | -    | *               | 4.40       |
| Thr29       | 8.11 | 113.54          | 4.31       | Leu64        | 8.18 | 121.97          | 4.23         | Thr29 | 8.11 | 113.62          | 4.31       | Leu64        | 8.20 | 122.05          | 4.22       |
| Gly30       | 8.23 | 110.34          | 3.89,3.95  | Lys65        | 8.24 | 123.48          | 4.61         | Gly30 | 8.23 | 110.36          | 3.95,3.89  | Lys65        | 8.26 | 123.65          | 4.60       |
| Tyr31       | 8.07 | 120.06          | 4.55       | Pro66        | -    | *               | 4.38         | Tyr31 | 8.07 | 120.08          | 4.56       | Pro66        | -    | *               | 4.38       |
| Gly32       | 8.34 | 110.86          | 3.97,3.88  | Ala67        | 8.31 | 124.65          | 4.29         | Gly32 | 8.35 | 110.92          | 3.97,3.88  | Ala67        | 8.31 | 124.72          | 4.29       |
| Ser33       | 8.18 | 115.69          | 4.47       | Lys68        | 8.18 | 120.10          | 4.35         | Ser33 | 8.19 | 115.76          | 4.47       | Lys68        | 8.18 | 120.17          | 4.35       |
| Ser34       | 8.34 | 117.25          | 4.49       | Ser69        | 8.26 | 117.74          | 4.44         | Ser34 | 8.35 | 117.32          | 4.49       | Ser69        | 8.26 | 117.79          | 4.43       |
| Ser35       | 8.16 | 117.07          | 4.44       | Ala70        | 8.02 | 129.97          | -            | Ser35 | 8.16 | 117.12          | 4.44       | Ala70        | 8.04 | 129.83          | 4.20       |

**Table S6.** Chemical shift differences between Asp51-IGF-1 and native IGF-1.

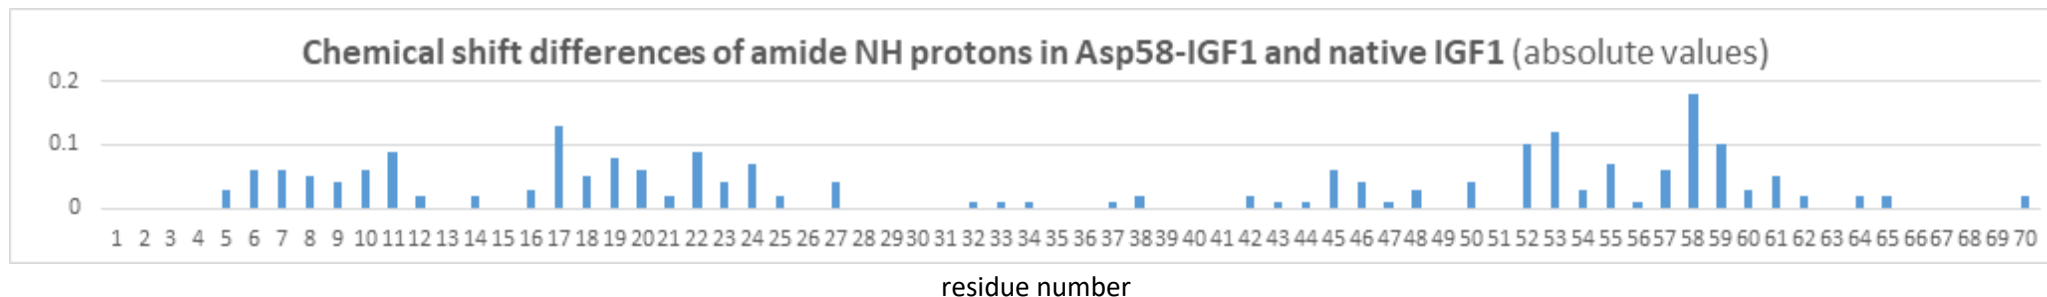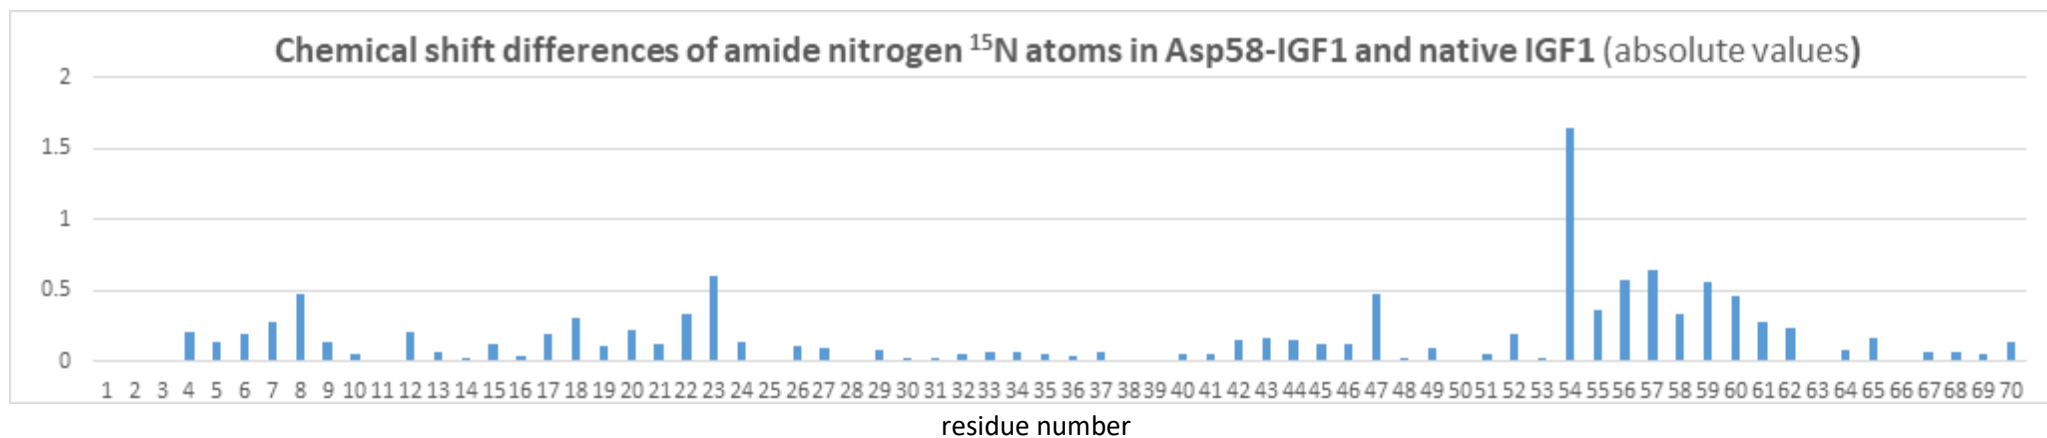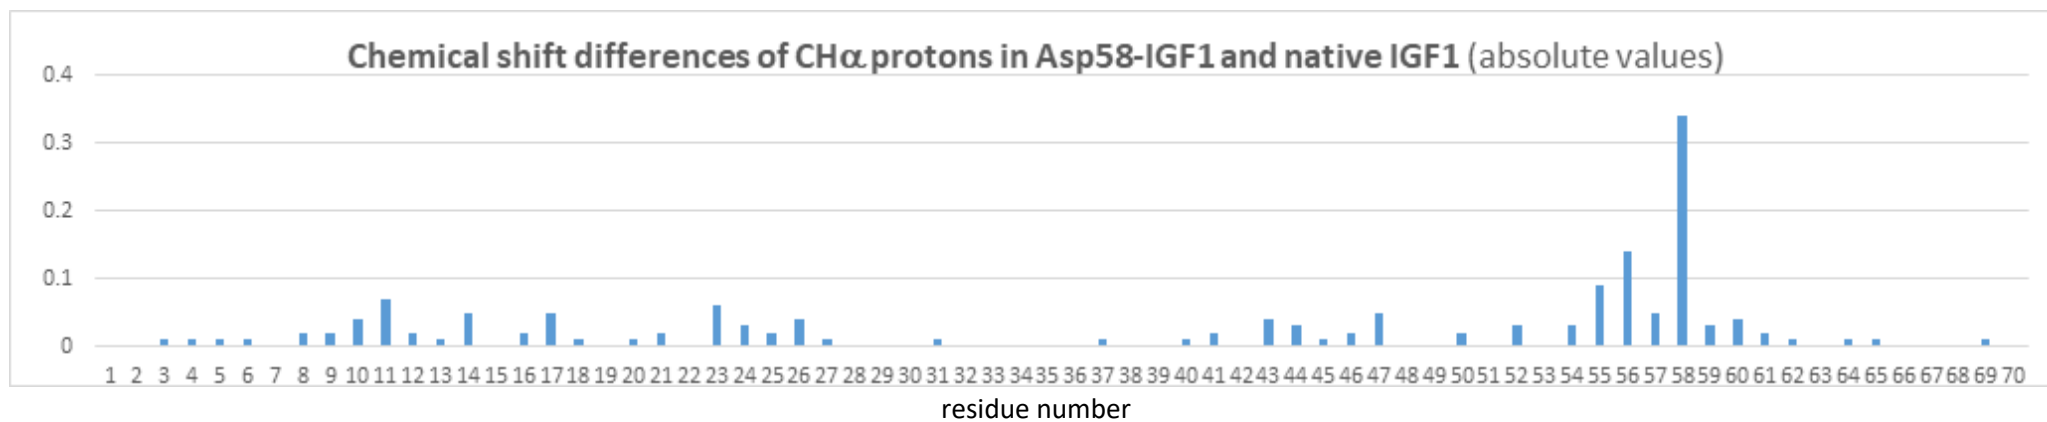

**Table S7.** NOEs statistics

|                                   |      |
|-----------------------------------|------|
| <i>Distance restraints (NOEs)</i> |      |
| Intra-residue                     | 330  |
| Sequential ( $ i-j  = 1$ )        | 159  |
| Medium range ( $ i-j  \leq 4$ )   | 48   |
| Long-range ( $ i-j  \geq 5$ )     | 57   |
| Ambiguous                         | 147  |
| Total                             | 741  |
| <i>Dihedral angle restraints</i>  |      |
| $\phi$                            | 18   |
| $\psi$                            | 18   |
| $\chi$                            | 3    |
| Total                             | 39   |
| <i>J-coupling restraints</i>      |      |
| Total                             | 10   |
| <i>Ensemble statistics*</i>       |      |
| Backbone (Å)                      | 0.46 |
| Heavy atoms (Å)                   | 0.92 |
| All atom (Å)                      | 1.09 |

---

\*only well-defined parts of the structure: Ala8-Cys18, Ile43-Tyr60

### **Differential Contact Maps calculated from metadynamics of the insulin B-chain C-terminus opening**

The inter-residue contacts with a negative difference in contact lifetime between the wild-type and mutants are those that are more frequently present in mutant compared to wild-type insulin (colored in orange in **Figure S7**). A range of hydrophobic contacts between the B-chain N-terminus (PheB1, ValB2) and the A chain (LeuA13, LeuA16) were established to maintain the collapsed state for HisA10 and HisA13 mutants, as well as the closed state for the HisA17 mutant. Contacts between the B-chain N-terminus and residues in the B-chain  $\alpha$ -helix were more frequently present in the collapsed/closed states of the His-insulin mutants. For example, the contacts in HisA13 mutant between residues HisB5-GlyB8, GlnB4-HisB10, GlnB4-GluB13 contributed to the partial collapse of the B-chain  $\alpha$ -helix. For the native-like affinity ThrA12 contacts that were formed more frequently than in the wild type (for example IleA2, ValA3 with LeuB15, LeuB11) maintained the hydrophobic interface between A/B chains in a more compact state.

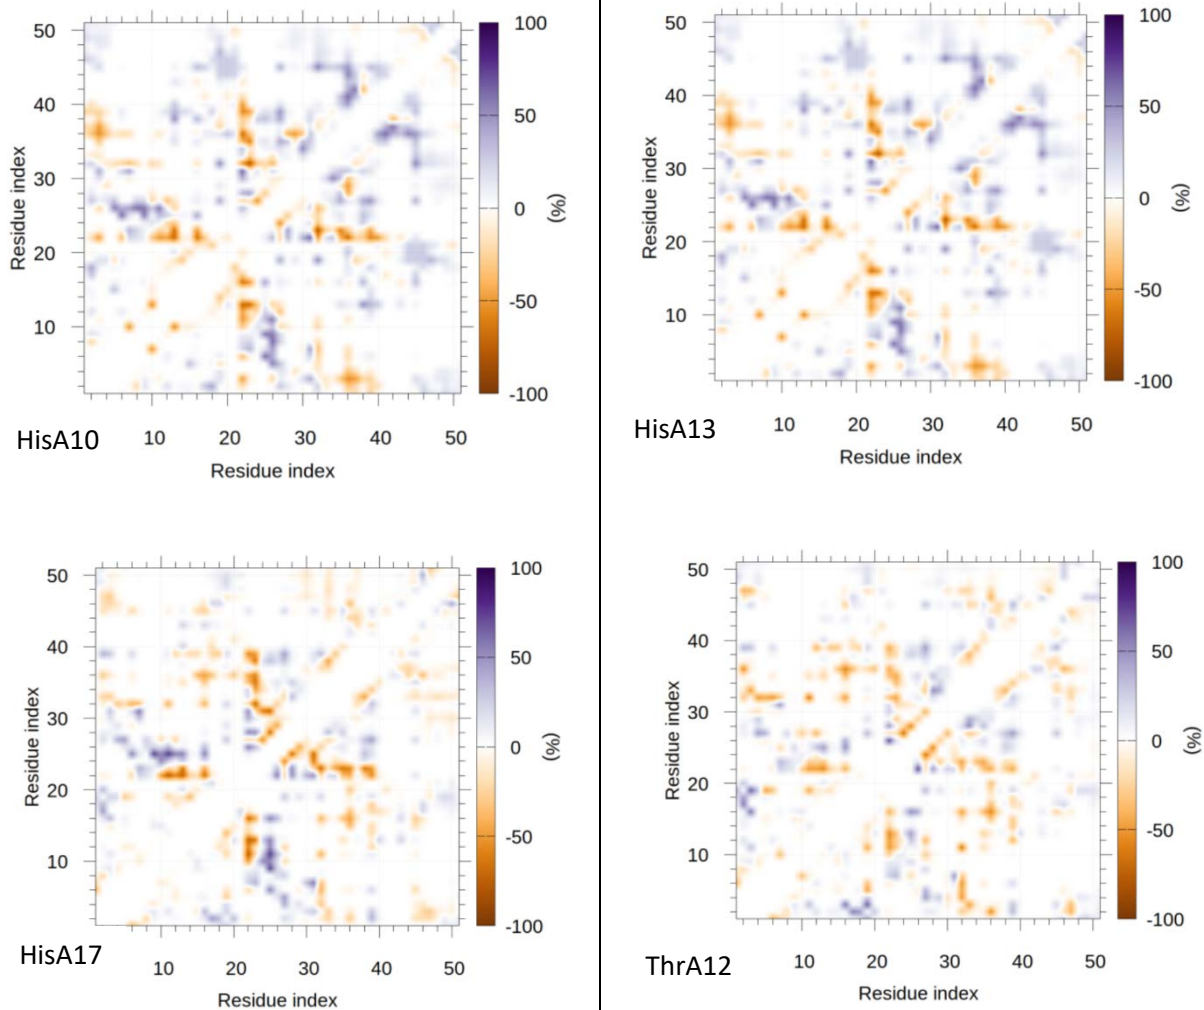

**Figure S7.** Change in total interaction time for insulin mutants calculated as the difference in fraction of time contacts are present between residues for the wild type and the mutant (a negative difference signifies a contact less frequently present in wild type or a contact gained in mutant). The residue index goes from 1-21 for A chain and 22-51 for B chain of insulin. HisA10-insulin, Left upper panel; HisA13-insulin, right upper panel; HisA17-insulin, left lower panel; ThrA12-insulin, right lower panel.



## Structural characterization of the metadynamics ensembles

The insulin hydrophobic core comprises residues IleA2, ValA3, GlyB8, LeuB11, ValB12, LeuB15, PheB24 and TyrB26 (8). We calculated its size in terms of the radius of gyration  $R_{\text{gyr}}$  comprising all atoms for the respective residues. The hydrophobic core is more compact for the mutants compared to the wild-type insulin, except for the HisA10-mutant which collapses to extended states (**Figure S8A**). Connected to the extent of the hydrophobic collapse, we observed different protein-water hydrogen bonding local to the point of mutation. The number of water-protein hydrogen bonds was determined for a shell of the radius 1 nm around the  $C_{\alpha}$  (CA) atom of a mutated residue. With OH and NH groups regarded as donors and O and N atoms as acceptors, the donor-acceptor cutoff distance was set to 0.35 nm and the angle hydrogen-donor-acceptor to  $30^{\circ}$ . The number of water-protein H-bonds in a sphere of a 1 nm radius around the  $C_{\alpha}$  atom of a mutated/wild-type residue is plotted in **Figure S8B** comparing the HisA17-mutant and ThrA12-mutant in red to wild-type native insulin in black. The dynamics of H-bond formation is more stable in the closed compact state of HisA17-mutant. On the other hand, the bulkier ThrA12 is buried inside the core and forms less H-bonds with water than the wild-type SerA12.

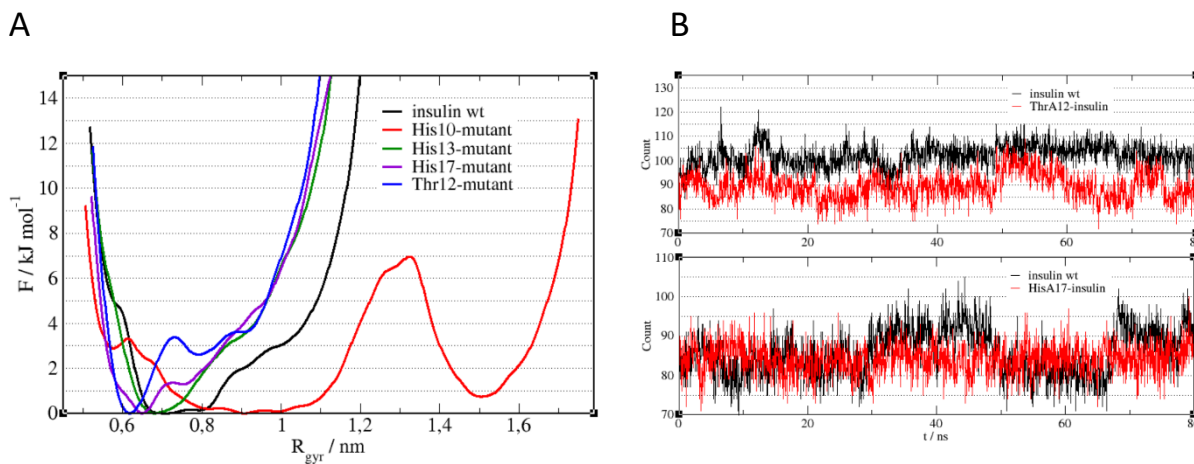

**Figure S8. A.** Free energy profiles with respect to the radius of gyration of residues defining the hydrophobic core. **B.** The number of protein-solvent hydrogen bonds in the sphere of 1 nm around  $C_{\alpha}$  atoms of mutated residues:  $C_{\alpha}$  (ThrA12) in ThrA12-insulin mutant and  $C_{\alpha}$  (SerA12) in wild-type insulin (up),  $C_{\alpha}$  (HisA17) in HisA17-insulin mutant and  $C_{\alpha}$  (GluA17) in native insulin (down). Insulin wt is a native wild-type insulin.

## References

1. Gauguin, L., Klaproth, B., Sajid, W., Andersen, A. S., Mcneil, K. A., Forbes, B. E., and De Meyts, P. (2008) Structural basis for the lower affinity of the insulin-like growth factors for the insulin receptor. *J. Biol. Chem.* **283**, 2604-2613
2. Kristensen, C., Kjeldsen, T., Wiberg, F. C., Schaffer, L., Hach, M., Havelund, S., Bass, J., Steiner, D. F., and Andersen, A. S. (1997) Alanine scanning mutagenesis of insulin. *J. Biol. Chem.* **272**, 12978-12983
3. De Meyts, P. (2015) Insulin/receptor binding: The last piece of the puzzle? *Bioessays* **37**, 389-397
4. Gauguin, L., Delaine, C., Alvino, C. L., McNeil, K. A., Wallace, J. C., Forbes, B. E., and De Meyts, P. (2008) Alanine scanning of a putative receptor binding surface of insulin-like growth factor-I. *J. Biol. Chem.* **283**, 20821-20829
5. Alvino, C. L., McNeil, K. A., Ong, S. C., Delaine, C., Booker, G. W., Wallace, J. C., Whittaker, J., and Forbes, B. E. (2009) A Novel approach to identify two distinct receptor binding surfaces of insulin-like growth factor II. *J. Biol. Chem.* **284**, 7656-7664
6. Delaine, C., Alvino, C. L., McNeil, K. A., Mulhern, T. D., Gauguin, L., De Meyts, P., Jones, E. Y., Brown, J., Wallace, J. C., and Forbes, B. E. (2007) A novel binding site for the human insulin-like growth factor-II (IGF-II)/mannose 6-phosphate receptor on IGF-II. *J. Biol. Chem.* **282**, 18886-18894
7. Schaffer, L. (1994) A model for insulin binding to the insulin receptor. *Eur. J. Biochem.* **221**, 1127-1132
8. Papaioannou, A., Kuyucak, S., and Kuncic, Z. (2015) Molecular dynamics simulations of insulin: elucidating the conformational changes that enable its binding. *Plos One* **10**
